# Supplementary material
Source: PubMed Central journal article supplement (PMC5335577)
Supplement: 10.1194_D070433_jlr.D070433-1.pdf [file 10.1194_D070433_jlr.D070433-1.pdf]

## Supplemental information

### Quantitative profiling of endocannabinoids and related N-acylethanolamines in human CSF using nano LC-MS/MS

Vasudev Kantae<sup>1, \*</sup>, Shinji Ogino<sup>1, \*</sup>, Marek Noga<sup>1</sup>, Amy C Harms<sup>1</sup>, Robin M van Dongen<sup>2</sup>, Gerrit LJ Onderwater<sup>2</sup>, Arn MJM van den Maagdenberg<sup>2,3</sup>, Gisela M Terwindt<sup>2</sup>, Mario van der Stelt<sup>4</sup>, Michel D Ferrari<sup>2</sup>, Thomas Hankemeier<sup>1</sup>

<sup>1</sup>Division of Analytical Biosciences, Leiden Academic Centre for Drug Research, Leiden University, The Netherlands

<sup>2</sup>Department of Neurology, Leiden University Medical Center, Leiden, The Netherlands

<sup>3</sup>Department of Human Genetics, Leiden University Medical Center, Leiden, The Netherlands

<sup>4</sup>Department of Bioorganic Synthesis, Leiden Institute of Chemistry, Leiden University, Leiden, The Netherlands

\*Authors contributed equally

Correspondence:

Prof. Thomas Hankemeier

Leiden Academic Centre for Drug Research, Leiden University

Einsteinweg 55

NL-2333 CC Leiden

Phone: +31 715274226

Fax: +31 715274277

Email: [hankemeier@lacdr.leidenuniv.nl](mailto:hankemeier@lacdr.leidenuniv.nl)

**Running title:** Quantitative profiling of endocannabinoids in human CSF

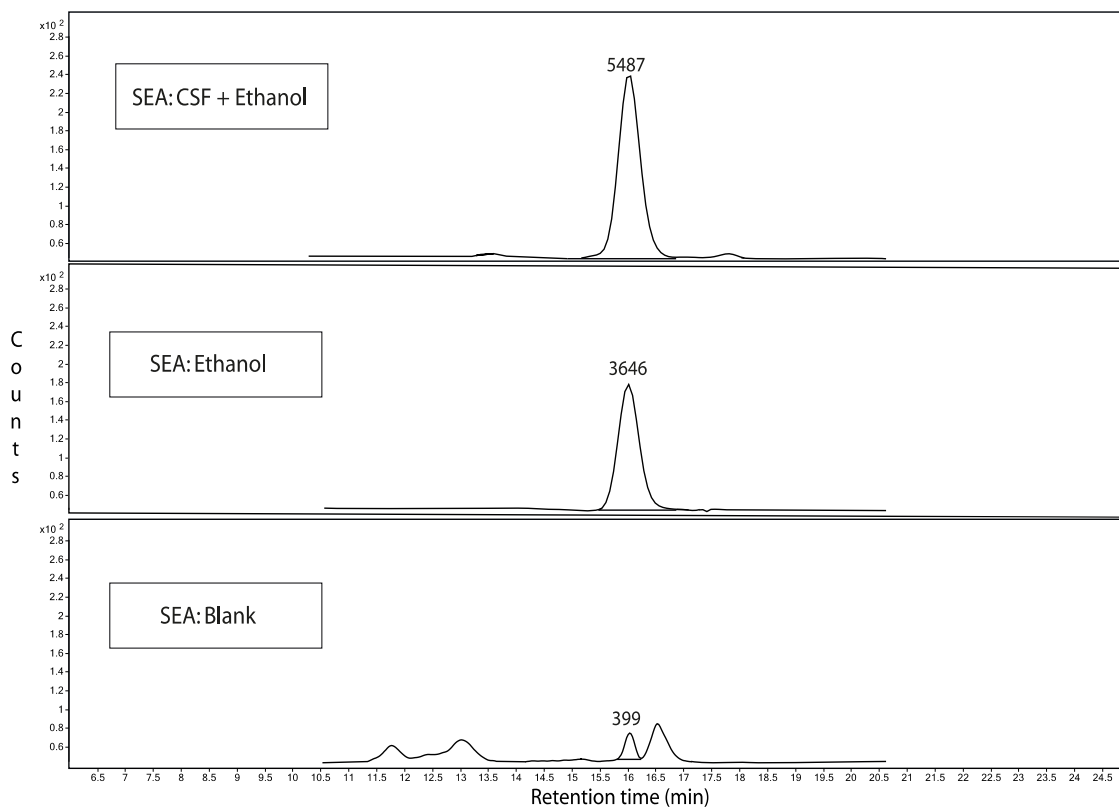

**Supplemental Figure S1: Contaminant of SEA from ethanol and blank(MeOH/H2O)**

Top window: chromatogram of SEA in sample with ethanol. Middle window: chromatogram of background SEA in pure ethanol. Bottom window: Chromatogram of background SEA in blank. X-axis is retention time and Y-axis is response signal.

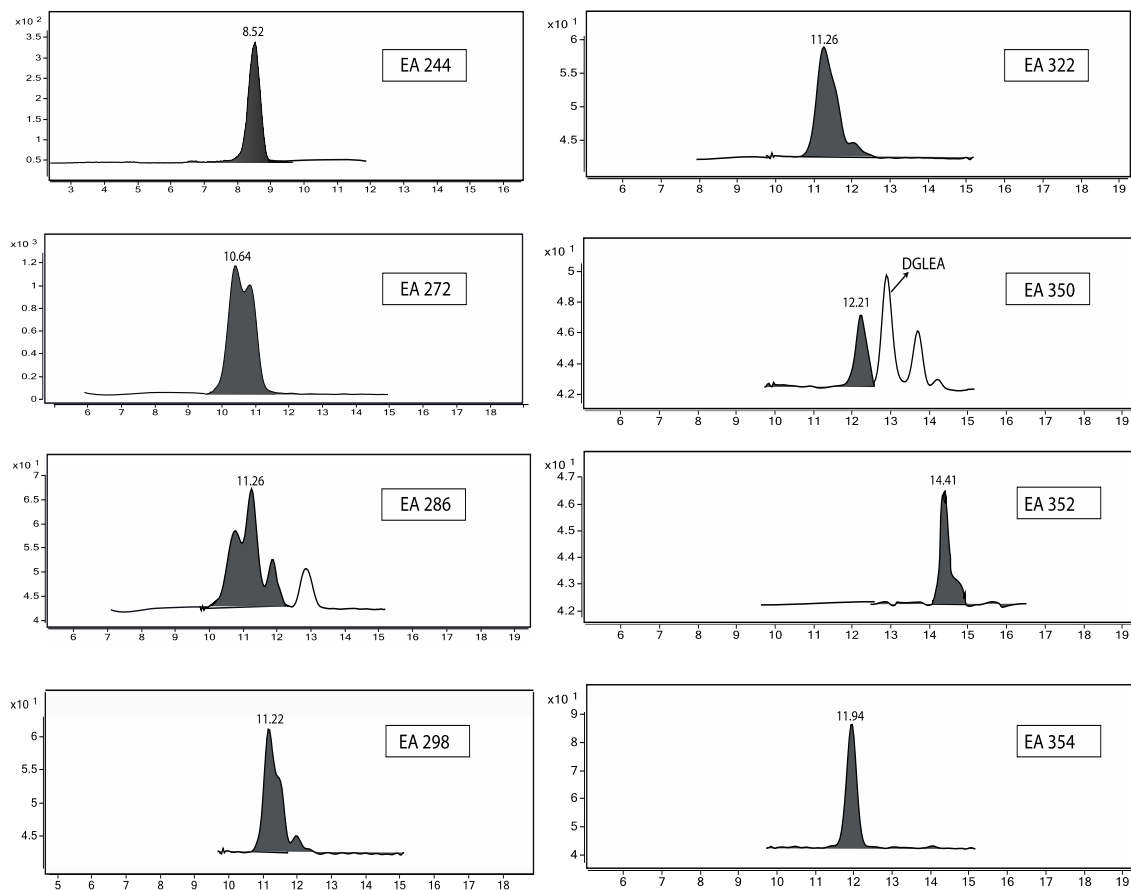

**Supplemental Figure S2: Chromatograms of putatively annotated NAEs in CSF.**

Putatively annotated NAEs are labeled as EA (from ethanolamine) followed by molecular mass (m/z) value. X-axis is retention time and Y-axis is response signal.

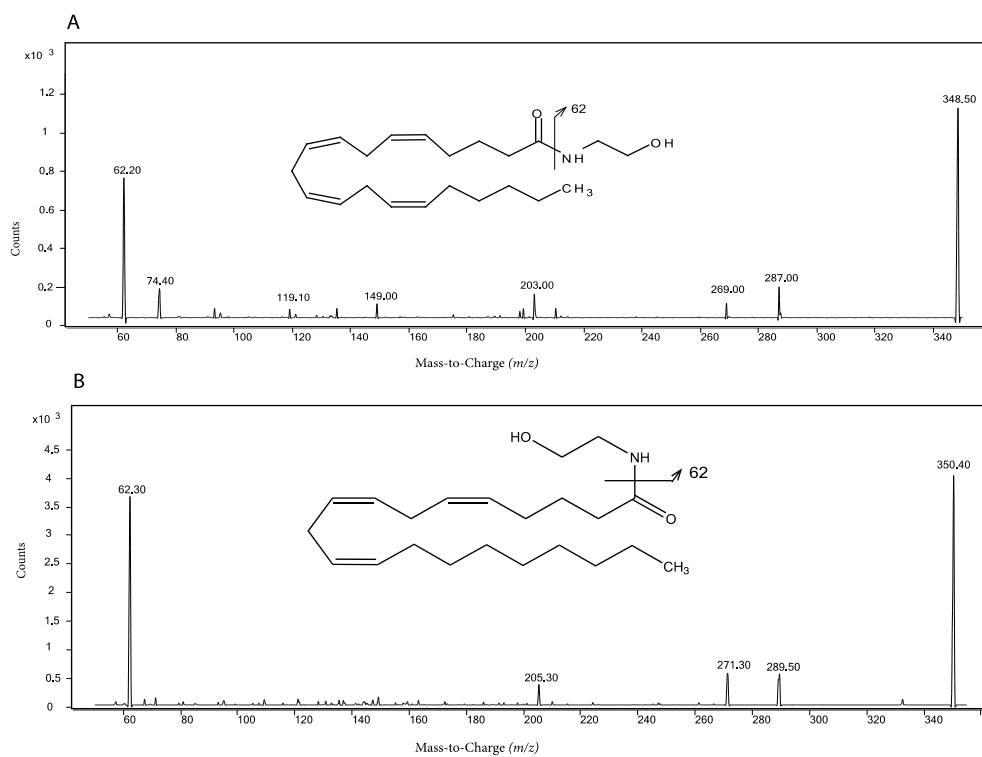

**Supplemental Figure S3: MS/MS fragmentation mass spectra of anandamide and EA350**

Fragmentation pattern of (A) anandamide ( $384.2 > 62.3$ ) and putatively annotated NAE, (B) EA350 ( $350.4 > 62.3$ ) in positive mode at a collision energy of 10V. X-axis is  $m/z$  and Y-axis is response signal.

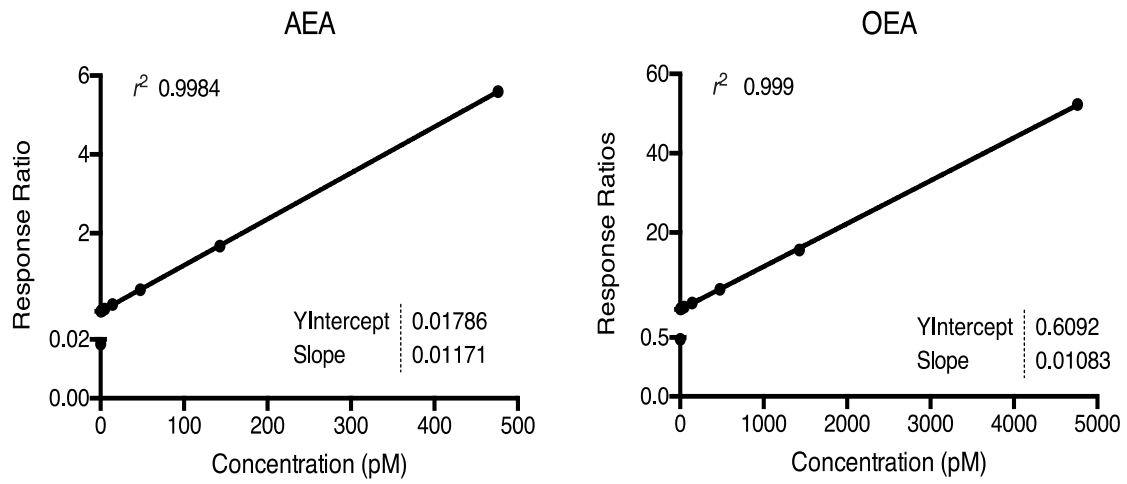

**Supplemental Figure S4: Calibration curves for AEA and OEA compounds**

The displayed calibration curves are constructed in matrix (standard-addition method) in their respective dynamic ranges and the y-intercept of the curve represents the endogenous concentrations.

**Supplemental Table S1:** MRM (Multiple reaction monitoring) parameters of the target list

| Compound Name | C | C = C | MW g/mole | Compound name | Precursor Ion (m/z) | Product Ion (m/z) | Dwell time (msec) | CE |
|---------------|---|-------|-----------|---------------|---------------------|-------------------|-------------------|----|
|---------------|---|-------|-----------|---------------|---------------------|-------------------|-------------------|----|

***Identified***

|                     |    |   |       |                                                     |       |       |     |    |
|---------------------|----|---|-------|-----------------------------------------------------|-------|-------|-----|----|
| PEA                 | 16 | 0 | 299.5 | <i>N</i> -palmitoylethanolamide                     | 300.3 | 62.1  | 20  | 10 |
| LEA                 | 18 | 2 | 323.5 | <i>N</i> -linoleoylethanolamide                     | 324.3 | 62.1  | 50  | 10 |
| OEA                 | 18 | 1 | 325.5 | <i>N</i> -oleoylethanolamide                        | 326.3 | 62.1  | 50  | 10 |
| SEA                 | 18 | 0 | 327.6 | <i>N</i> -stearoylethanolamide                      | 328.3 | 62.1  | 300 | 10 |
| AEA                 | 20 | 4 | 347.5 | <i>N</i> -arachidonoyl ethanolamide                 | 348.3 | 62.1  | 200 | 10 |
| DGLEA               | 20 | 3 | 349.6 | <i>N</i> -dihomo- $\gamma$ -linolenoyl ethanolamide | 350.3 | 62.1  | 400 | 10 |
| DHEA                | 22 | 6 | 371.6 | <i>N</i> -docosahexaenoyl ethanolamide              | 372.3 | 62.1  | 100 | 10 |
| DEA                 | 22 | 4 | 375.6 | <i>N</i> -docosatetraenoyl ethanolamide             | 376.3 | 62.1  | 400 | 10 |
| 1&2-AG <sup>a</sup> | 20 | 4 | 378.6 | <i>N</i> -arachidonoyl glycerol                     | 379.3 | 287.1 | 100 | 5  |

***Internal Standards***

|           |    |   |       |                                             |       |       |     |    |
|-----------|----|---|-------|---------------------------------------------|-------|-------|-----|----|
| PEA - d4  | 16 | 0 | 303.5 | <i>N</i> -palmitoylethanolamide - d4        | 304.3 | 62.1  | 20  | 10 |
| LEA - d4  | 18 | 2 | 327.5 | <i>N</i> -linoleoylethanolamide - d4        | 328.3 | 66.1  | 20  | 10 |
| OEA - d4  | 18 | 1 | 329.6 | <i>N</i> -oleoylethanolamide - d4           | 330.3 | 66.1  | 20  | 10 |
| SEA - d3  | 18 | 0 | 330.6 | <i>N</i> -stearoylethanolamide - d3         | 331.3 | 62.1  | 100 | 10 |
| AEA - d8  | 20 | 4 | 355.6 | <i>N</i> -arachidonoyl ethanolamide - d8    | 356.3 | 62.1  | 20  | 10 |
| DHEA - d4 | 22 | 6 | 375.6 | <i>N</i> -docosahexaenoyl ethanolamide - d4 | 376.3 | 66.1  | 20  | 10 |
| 2-AG - d8 | 20 | 4 | 386.6 | <i>N</i> -arachidonoyl glycerol - d8        | 387.3 | 294.1 | 100 | 10 |

| Compound Name | C | C = C | MW g/mole | Compound name | Precursor Ion (m/z) | Product Ion (m/z) | Dwell time (msec) | CE |
|---------------|---|-------|-----------|---------------|---------------------|-------------------|-------------------|----|
|---------------|---|-------|-----------|---------------|---------------------|-------------------|-------------------|----|

*Putatively annotated*

|       |    |   |       |                                            |       |      |     |    |
|-------|----|---|-------|--------------------------------------------|-------|------|-----|----|
| EA244 | 12 | 0 | 243.5 | <i>N</i> -laurylethanolamide               | 244.3 | 62.1 | 800 | 10 |
| EA272 | 14 | 0 | 271.5 | <i>N</i> -myristylethanolamide             | 272.3 | 62.1 | 400 | 10 |
| EA286 | 15 | 0 | 285.5 | <i>N</i> -pentadecanoylethanolamide        | 286.3 | 62.1 | 800 | 10 |
| EA298 | 16 | 1 | 297.5 | <i>N</i> -palmitoleoylethanolamide         | 298.3 | 62.1 | 50  | 10 |
| EA322 | 18 | 3 | 321.5 | <i>N</i> - $\alpha$ -linolenylethanolamide | 322.3 | 62.1 | 100 | 10 |
| EA350 | 20 | 3 | 349.5 | <i>N</i> -eicosatrienoylethanolamide       | 350.3 | 62.1 | 150 | 10 |
| EA352 | 20 | 2 | 351.5 | <i>N</i> -eicosadienoylethanolamide        | 352.3 | 62.1 | 150 | 10 |
| EA354 | 20 | 1 | 353.5 | <i>N</i> -eicosenoylethanolamide           | 354.3 | 62.1 | 50  | 10 |

*Not detected in CSF*

|       |    |   |       |                                    |       |       |     |    |
|-------|----|---|-------|------------------------------------|-------|-------|-----|----|
| O-AEA | 20 | 4 | 347.5 | <i>O</i> -arachidonoylethanolamine | 348.3 | 62.1  | 200 | 10 |
| NADA  | 20 | 4 | 439.6 | <i>N</i> -arachidonoyldopamine     | 440.4 | 137   | 50  | 25 |
| 2-AGE | 20 | 4 | 364.6 | 2-arachidonyl glyceryl ether       | 365.2 | 273.1 | 50  | 13 |

The target list includes identified compounds, deuterated ISTDs, putatively annotated compounds and compounds which are included in the list but are not detected in the sample. All compounds are analyzed in positive mode. The fragmentor voltage is at 100V for all transitions. "C" and "C=C" = number of carbon atoms and number of double bonds in the fatty acid chain of the molecule, respectively; MW= molecular weight (g/mole); m/z = mass-to-charge ratio; CE= Collision energy (volts); <sup>a</sup>Parameters are same for 1-AG and 2-AG.

**Supplemental Table S2:** Results from linear regression analysis (n=45 healthy controls)

(A)

| Compound    | Gender             |                         |                | Age                |                         |                | R <sup>2</sup> |
|-------------|--------------------|-------------------------|----------------|--------------------|-------------------------|----------------|----------------|
|             | <i>Coefficient</i> | <i>95% C.I.</i>         | <i>P-value</i> | <i>Coefficient</i> | <i>95% C.I.</i>         | <i>P-value</i> |                |
| <b>DHEA</b> | <b>1.1795</b>      | <b>[0.9351; 1.4878]</b> | <b>0.1588</b>  | <b>1.0097</b>      | <b>[1.0020; 1.0175]</b> | <b>*0.015</b>  | 14.4%          |
| DEA         | 0.9857             | [0.7902; 1.2296]        | 0.8960         | 1.0004             | [0.9931; 1.0077]        | 0.919          | 0.1%           |
| DGLEA       | 1.1698             | [0.9230; 1.4826]        | 0.1889         | 1.0018             | [0.9939; 1.0097]        | 0.653          | 4.1%           |
| AEA         | 0.9270             | [0.7483; 1.1484]        | 0.4790         | 1.0040             | [0.9969; 1.0111]        | 0.267          | 5.4%           |
| 1&2-AG      | 1.0694             | [0.8331; 1.3726]        | 0.5906         | 1.0044             | [0.9961; 1.0127]        | 0.295          | 2.8%           |
| LEA         | 1.0738             | [0.7618; 1.5137]        | 0.6776         | 1.0009             | [0.9896; 1.0123]        | 0.876          | 0.4%           |
| PEA         | 0.9989             | [0.7705; 1.2950]        | 0.9932         | 1.0000             | [0.9915; 1.0087]        | 0.991          | 0.0%           |
| OEA         | 1.0917             | [0.8712; 1.3680]        | 0.4368         | 1.0016             | [0.9942; 1.0091]        | 0.663          | 1.6%           |
| SEA         | 1.0338             | [0.8182; 1.3063]        | 0.7755         | 0.9981             | [0.9904; 1.0058]        | 0.615          | 1.1%           |
| EA354       | 0.9867             | [0.9509; 1.0238]        | 0.4672         | 0.9994             | [0.9982; 1.0006]        | 0.322          | 2.8%           |
| EA350       | 0.9667             | [0.7446; 1.2552]        | 0.7951         | 1.0052             | [0.9966; 1.0139]        | 0.232          | 4.2%           |
| EA352       | 1.0897             | [0.8656; 1.3716]        | 0.4557         | 1.0039             | [0.9963; 1.0116]        | 0.309          | 3.0%           |
| EA298       | 1.1462             | [0.8317; 1.5796]        | 0.3956         | 1.0116             | [1.0009; 1.0224]        | *0.034         | 10.4%          |
| EA286       | 1.1764             | [0.8131; 1.7021]        | 0.3798         | 1.0066             | [0.9944; 1.0190]        | 0.284          | 3.6%           |
| EA244       | 0.9283             | [0.5816; 1.4816]        | 0.7496         | 0.9982             | [0.9829; 1.0138]        | 0.817          | 0.3%           |
| EA272       | 0.9624             | [0.6535; 1.4172]        | 0.8425         | 0.9969             | [0.9842; 1.0097]        | 0.623          | 0.6%           |
| EA322       | 1.0782             | [0.6364; 1.8266]        | 0.7747         | 0.9961             | [0.9788; 1.0136]        | 0.651          | 0.9%           |



**(B)**

|         |      | <b>Age</b>         |                  |                | <b>R<sup>2</sup></b> |
|---------|------|--------------------|------------------|----------------|----------------------|
|         |      | <i>Coefficient</i> | <i>95% C.I.</i>  | <i>P-value</i> |                      |
| Males   | DHEA | 1.0141             | [1.0036; 1.0246] | 0.0106         | 27.3%                |
| Females | DHEA | 1.0023             | [0.9902; 1.0146] | 0.6969         | 7.7%                 |

**(A)** For each compound, its relative concentration was set as dependent variable with gender and age as predictors. Regression coefficients were exponentiated because the dependent variable was log-transformed. **(B)** Regression analysis split by gender for DHEA.
